# Supplementary material
Source: Springer Nature journal article supplement (https://www.springermedizin.de/resource/supplementary/12967_2011_853_MOESM2_ESM.pdf/9577176)

A

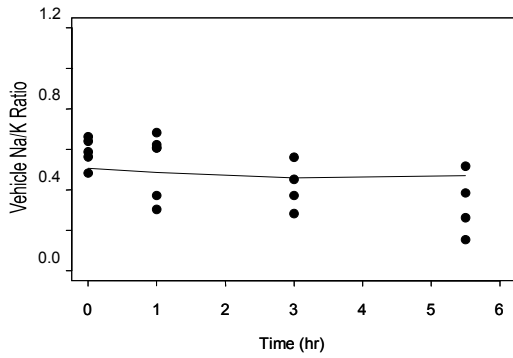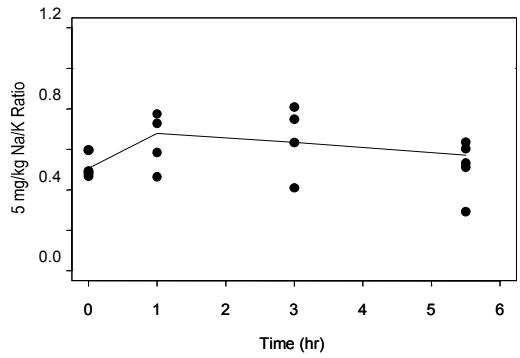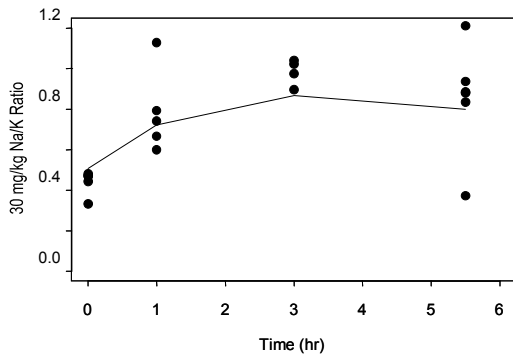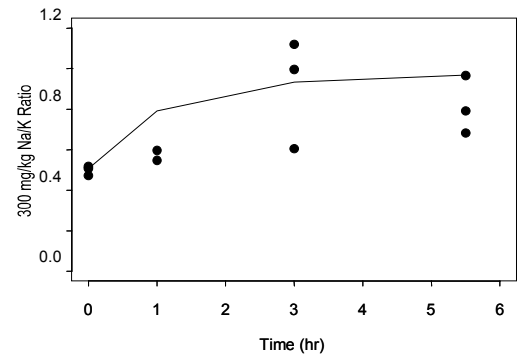

B

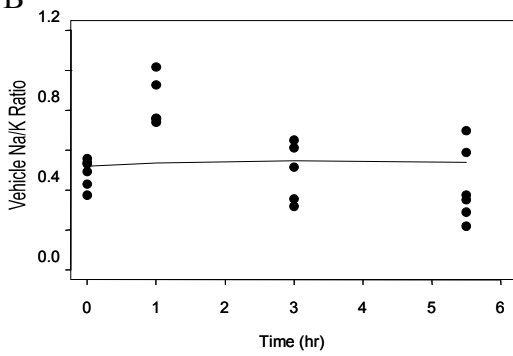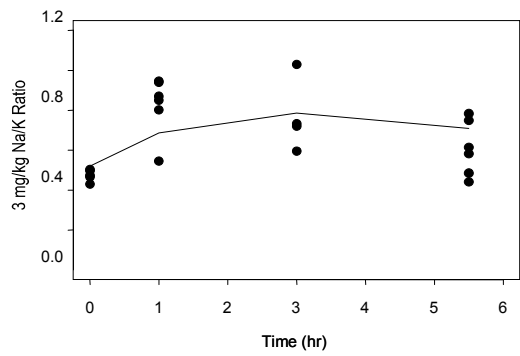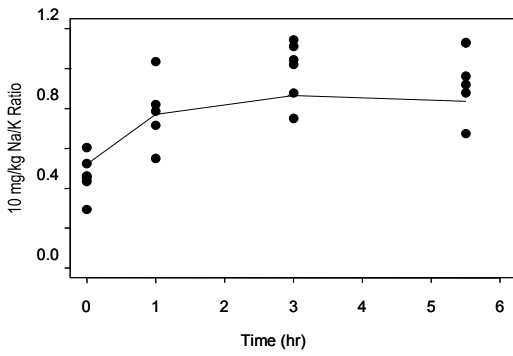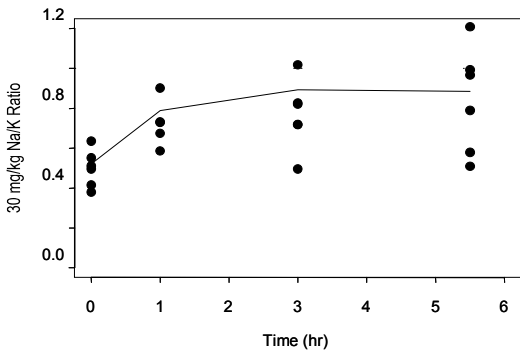

Supplement: MOESM2 [file 9577176]
